# Supplementary material
Source: MDPI journal article supplement (https://www.mdpi.com/2071-1050/5/5/1974)
Supplement: s1 [file s1]

## Supplementary Material

### Material and methods

In the following, a glossary of terms and the data used to support the analysis of the direct economic value of the North Sea cod stock is described.

### Glossary of terms

Given the complexity of the fisheries objectives used by ICES when providing scientific recommendations for EU fish stocks under TAC regulation, we include a glossary of terms gathered from ICES ([http://www.ices.dk/community/Documents/Advice/Acronyms\\_and\\_terminology.pdf](http://www.ices.dk/community/Documents/Advice/Acronyms_and_terminology.pdf)) and [36] in order to better understand and interpret the data and results presented in the paper. Many of these are mentioned in the manuscript and also illustrated in Figure 1.

**TAC:** Total Allowable Catches annually allocated to each member State under the Common Fisheries Policy.

**Overshooting:** the level of compliance of fishing quotas (total removals/TAC).

**F<sub>current</sub>:** Fishing mortality estimated for the current assessment year.

**F<sub>management plan</sub>:** Fishing mortality reference point as defined in management plans. A management plan includes the decision-making processes (harvest control rules, tactical decision making) and the sanctions on implementation and the requirements for monitoring and reporting. Management plans may also exist in the form of rebuilding plans or recovery plans.

**F<sub>pa</sub>:** Precautionary reference point for fishing mortality (mean over defined age range).

**F<sub>lim</sub>:** Limit reference point for fishing mortality (mean over defined age range).

### Supporting Tables

**Table S1.** Main variables for the North Sea cod stock in ICES areas IV, VIIId, IIIa (in thousand t).

| Year | Reported<br>TB | Estimated<br>TB <sub>TAC</sub> | Estimated<br>TB <sub>SRs</sub> | Estimated<br>TB <sub>Catches</sub> | Estimated<br>TB <sub>Catches*</sub> | TACs  | SRs   | Total<br>removals |
|------|----------------|--------------------------------|--------------------------------|------------------------------------|-------------------------------------|-------|-------|-------------------|
| 1987 | 568.6          |                                |                                |                                    |                                     | 206.9 | 133.5 | 248.2             |
| 1988 | 450.9          |                                |                                |                                    |                                     | 191.6 | 170.0 | 199.5             |
| 1989 | 413.3          |                                |                                |                                    |                                     | 159.5 | 157.0 | 169.0             |
| 1990 | 308.9          |                                |                                |                                    |                                     | 145.9 | 143.0 | 132.6             |
| 1991 | 284.0          |                                |                                |                                    |                                     | 138.7 | 116.3 | 120.2             |
| 1992 | 374.7          |                                |                                |                                    |                                     | 117.7 | 109.0 | 134.8             |
| 1993 | 341.4          |                                |                                |                                    |                                     | 118.5 | 121.0 | 149.3             |
| 1994 | 397.1          |                                |                                |                                    |                                     | 120.4 | 124.3 | 153.4             |
| 1995 | 432.7          |                                |                                |                                    |                                     | 144.0 | 139.2 | 185.9             |
| 1996 | 368.4          |                                |                                |                                    |                                     | 156.5 | 158.4 | 165.5             |
| 1997 | 450.4          |                                |                                |                                    |                                     | 138.3 | 150.6 | 166.3             |
| 1998 | 282.0          |                                |                                |                                    |                                     | 168.7 | 179.8 | 140.7             |
| 1999 | 213.2          |                                |                                |                                    |                                     | 157.7 | 146.9 | 100.9             |

Table S1. Cont.

| Year | Reported<br>TB | Estimated<br>TB <sub>TAC</sub> | Estimated<br>TB <sub>SRs</sub> | Estimated<br>TB <sub>Catches</sub> | Estimated<br>TB <sub>Catches*</sub> | TACs  | SRs   | Total<br>removals |
|------|----------------|--------------------------------|--------------------------------|------------------------------------|-------------------------------------|-------|-------|-------------------|
| 2000 | 246.9          |                                |                                |                                    |                                     | 96.2  | 92.8  | 101.9             |
| 2001 | 196.2          |                                |                                |                                    |                                     | 57.6  | 0.0   | 90.8              |
| 2002 | 205.6          |                                |                                |                                    |                                     | 57.9  | 0.0   | 88.5              |
| 2003 | 128.5          |                                |                                |                                    |                                     | 32.5  | 0.0   | 60.7              |
| 2004 | 117.9          |                                |                                |                                    |                                     | 31.4  | 0.0   | 47.6              |
| 2005 | 118.6          |                                |                                |                                    |                                     | 31.9  | 0.0   | 47.0              |
| 2006 | 122.2          |                                |                                |                                    |                                     | 27.6  | 0.0   | 41.6              |
| 2007 | 157.0          |                                |                                |                                    |                                     | 24.5  | 0.0   | 56.1              |
| 2008 | 155.4          |                                |                                |                                    |                                     | 27.1  | 0.0   | 54.1              |
| 2009 | 167.2          |                                |                                |                                    |                                     | 34.6  | 0.0   | 56.8              |
| 2010 | 187.9          | 187.9                          | 187.9                          | 187.9                              | 187.9                               | 79.0  | 75.3  | 84.4              |
| 2011 |                | 211.0                          | 214.8                          | 186.0                              | 194.1                               | 88.8  | 86.0  | 83.6              |
| 2012 |                | 236.2                          | 244.6                          | 184.1                              | 200.2                               | 99.4  | 98.0  | 82.7              |
| 2013 |                | 263.6                          | 277.7                          | 182.3                              | 206.5                               | 110.9 | 111.2 | 81.9              |
| 2014 |                | 293.2                          | 313.8                          | 180.5                              | 212.7                               | 123.4 | 125.7 | 81.1              |
| 2015 |                | 324.9                          | 353.1                          | 178.9                              | 218.9                               | 136.7 | 141.5 | 80.4              |
| 2016 |                | 358.5                          | 395.4                          | 177.2                              | 225.1                               | 150.8 | 158.4 | 79.6              |
| 2017 |                | 394.0                          | 440.4                          | 175.7                              | 231.3                               | 165.8 | 176.4 | 78.9              |
| 2018 |                | 431.0                          | 487.7                          | 174.1                              | 237.5                               | 181.3 | 195.4 | 78.3              |
| 2019 |                | 469.2                          | 536.8                          | 172.7                              | 243.6                               | 197.4 | 215.1 | 77.6              |
| 2020 |                | 508.3                          | 587.2                          | 171.3                              | 249.6                               | 213.8 | 235.3 | 77.0              |
| 2011 |                | 547.8                          | 638.1                          | 169.9                              | 255.6                               | 230.5 | 255.7 | 76.3              |
| 2022 |                | 587.4                          | 688.9                          | 168.6                              | 261.6                               | 247.1 | 276.0 | 75.7              |

Source: own elaboration from [44] and the surplus production model. Estimated values provided by the model are shown in italics. \* Estimates including a 50% discards reduction.

**Table S2.** Fishing effort and overshooting of the North Sea cod stock in ICES areas IV, VIIId, IIIa.

| Year | F <sub>current</sub> | F <sub>lim</sub> | F <sub>pa</sub> | F <sub>Management Plan</sub> | Overshooting |
|------|----------------------|------------------|-----------------|------------------------------|--------------|
| 2002 | 0.92                 | 0.86             | 0.65            |                              | 1.56         |
| 2003 | 0.90                 | 0.86             | 0.65            |                              | 1.94         |
| 2004 | 0.85                 | 0.86             | 0.65            |                              | 1.52         |
| 2005 | 0.80                 | 0.86             | 0.65            |                              | 1.50         |
| 2006 | 0.72                 | 0.86             | 0.65            |                              | 1.35         |
| 2007 | 0.66                 | 0.86             | 0.65            |                              | 2.44         |
| 2008 | 0.63                 | 0.86             | 0.65            | 0.40                         | 2.12         |
| 2009 | 0.60                 | 0.86             | 0.65            | 0.40                         | 1.72         |
| 2010 | 0.58                 | 0.86             | 0.65            | 0.40                         | 2.08         |
| 2011 | 0.57                 | 0.86             | 0.65            | 0.40                         | 2.59         |
| 2012 | 0.57                 | 0.86             | 0.65            | 0.40                         | 2.60         |

Source: own elaboration from [44].
